# Supplementary material for: Validity of the KOJI AWARENESS self-screening test for body movement and comparison with functional movement screening
Source: PubMed Central journal article supplement (PMC9803145; doi:10.1371/journal.pone.0277167), 2022-12-30
Supplement: pone.0277167.s002.pdf [file pone.0277167.s002.pdf]

S1 Appendix

KOJI AWARENES<sup>TM</sup>

S1 Appendix

# KOJI AWARENESS™ movement test

# 1, Neck Mobility

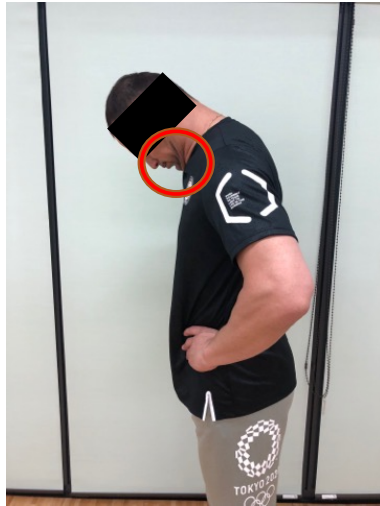

1 point

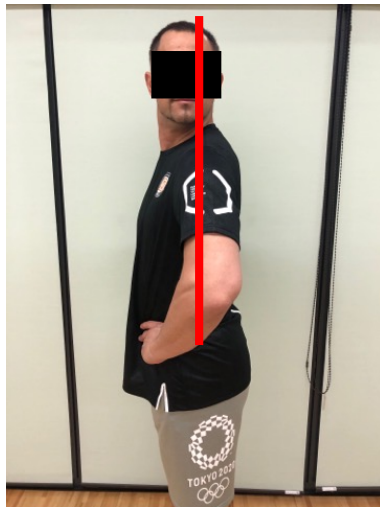

L: 1 point, R: 1 point

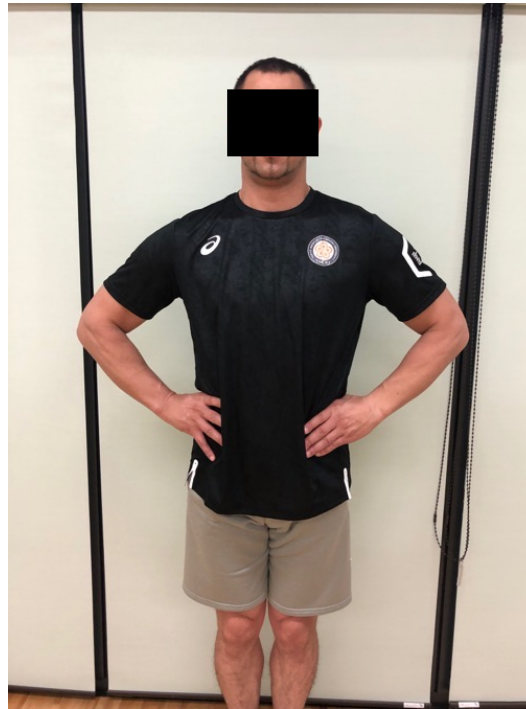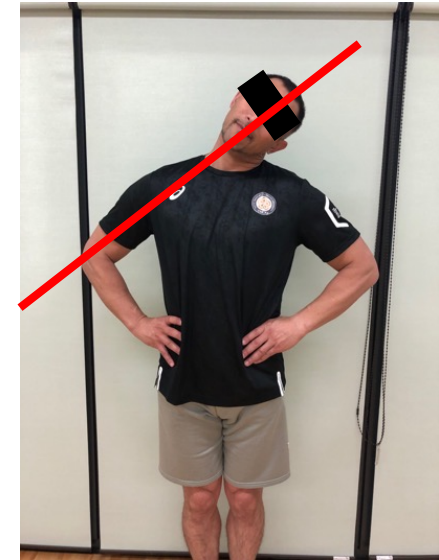

L: 1 point, R: 1 point

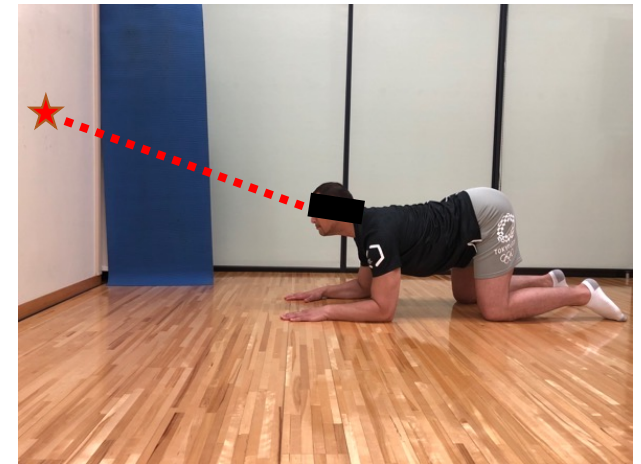

1 point

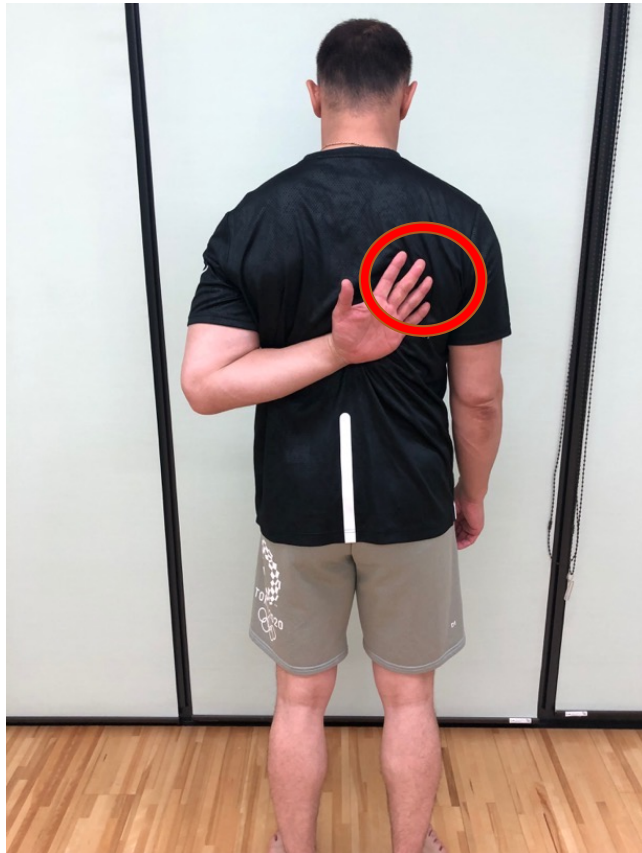

## 2, Shoulder Mobility

L: 1 point, R: 1 point

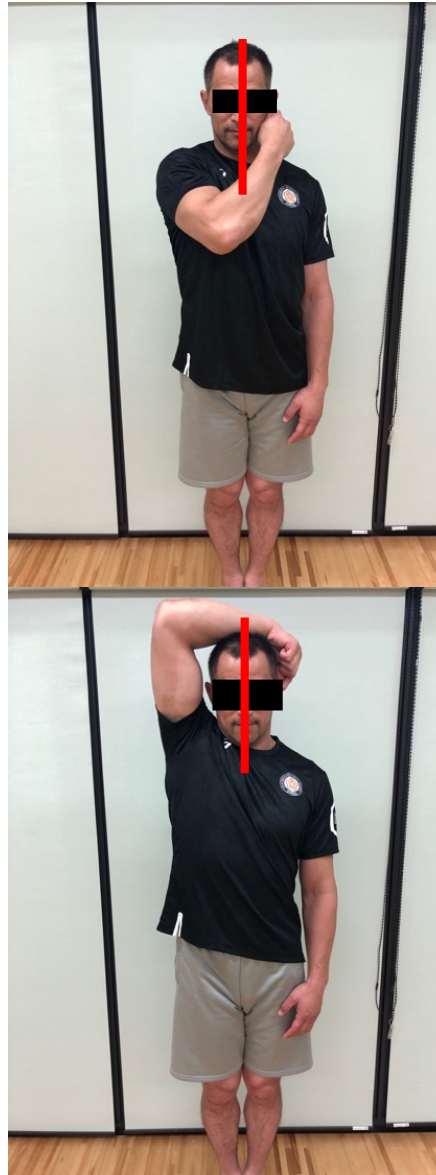

## 3, Shoulder Blade (Scapular) Mobility

L: 1 point, R: 1 point

## 4, Thoracic Spine Mobility

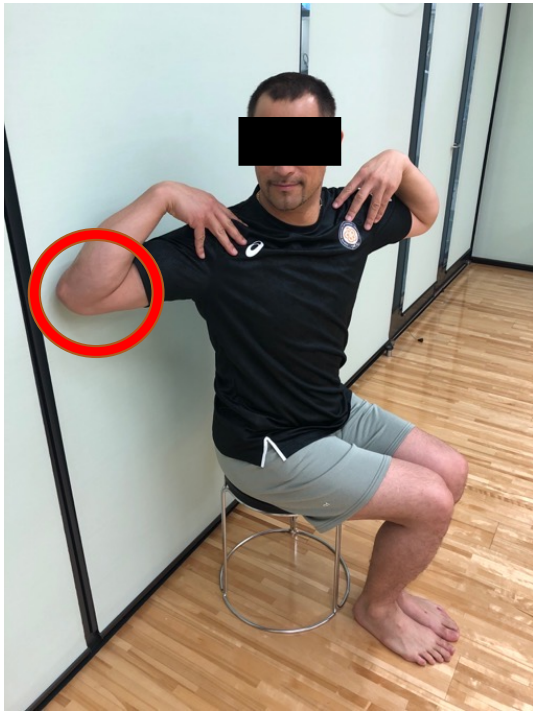

1 point

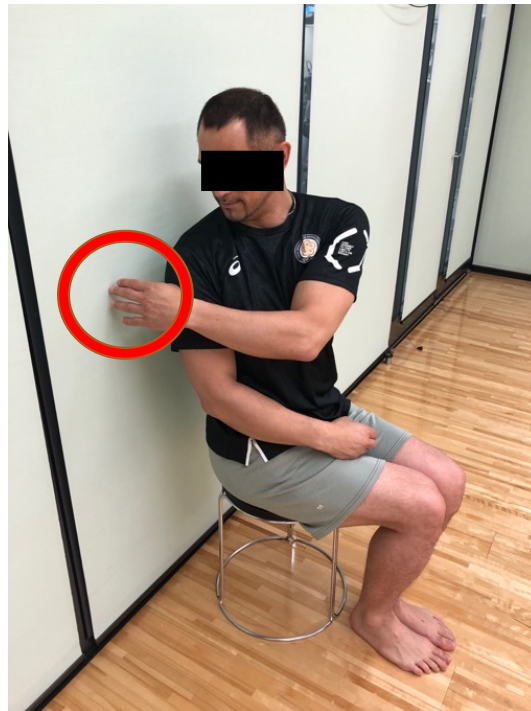

2 point

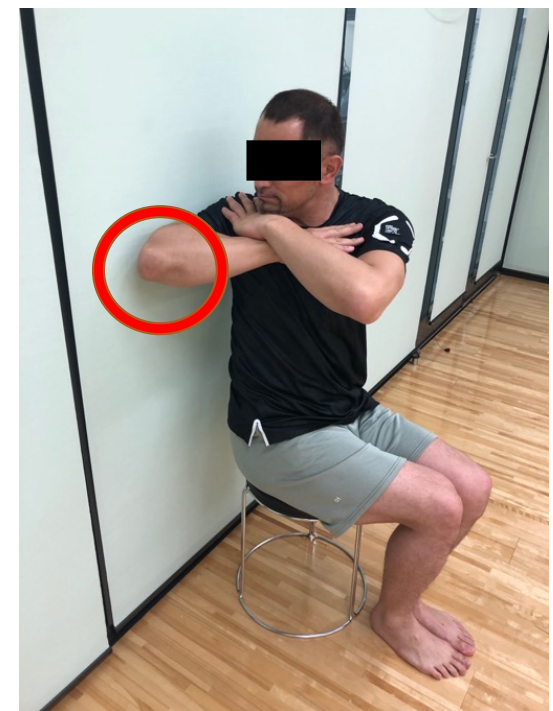

3 point



# 5, Upper Extremity Stability & Strength

10 sec

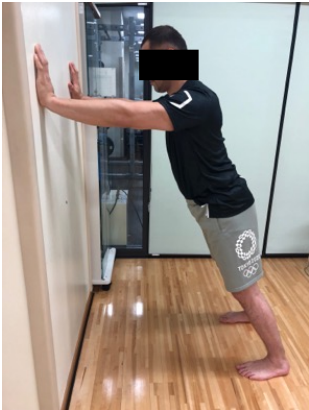

1 point

10 sec

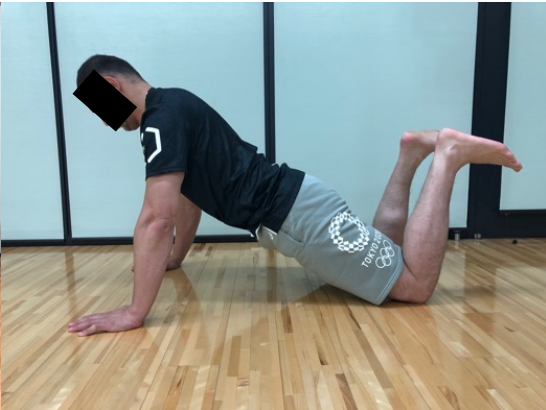

2 point

10 sec

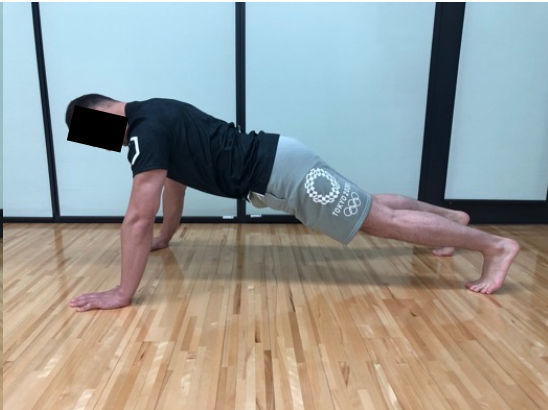

3 point

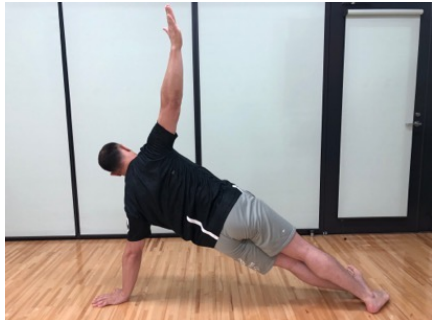

3 sec

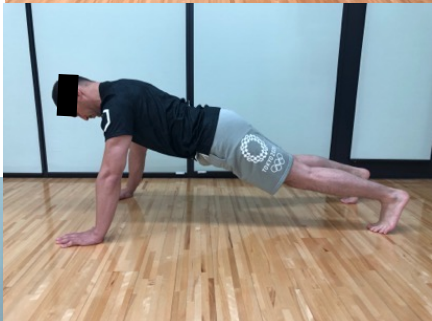

5 sec

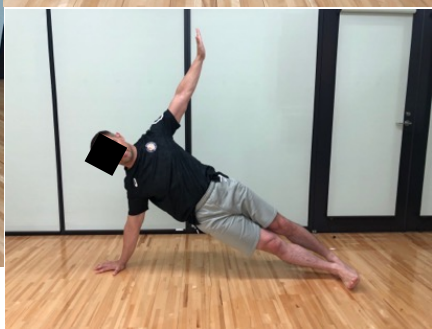

3 sec

4 point

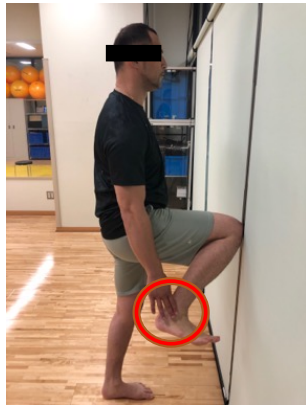

L: 1 point, R: 1 point

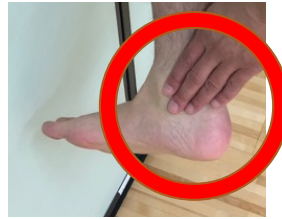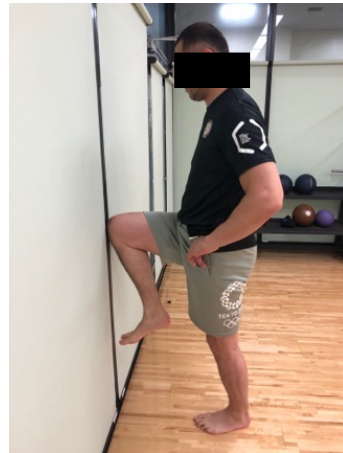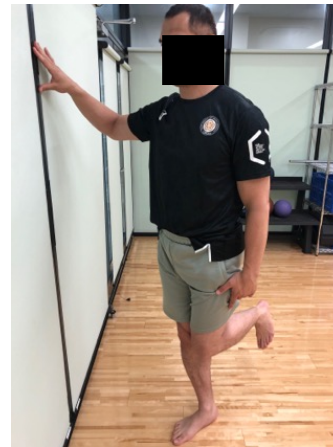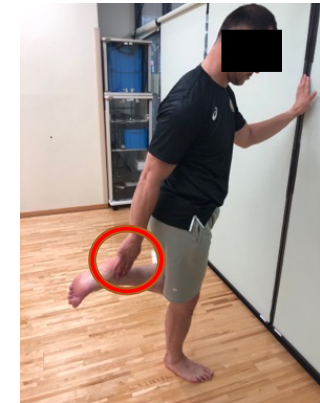

L: 1 point, R: 1 point

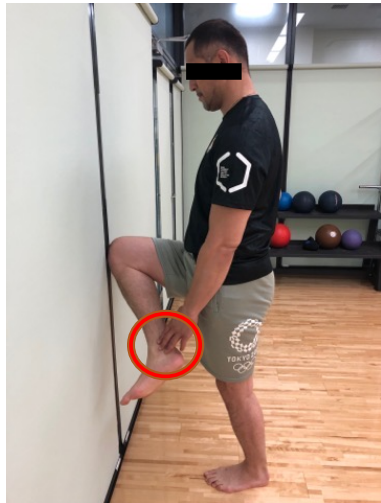

L: 1 point, R: 1 point

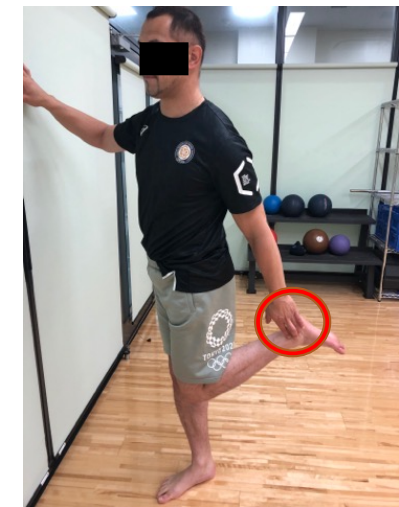

L: 1 point, R: 1 point

## 6, Hip Mobility

Flex Internal and External Rotation

Extend Internal and External Rotation

## 7, Hip and Spine Mobility

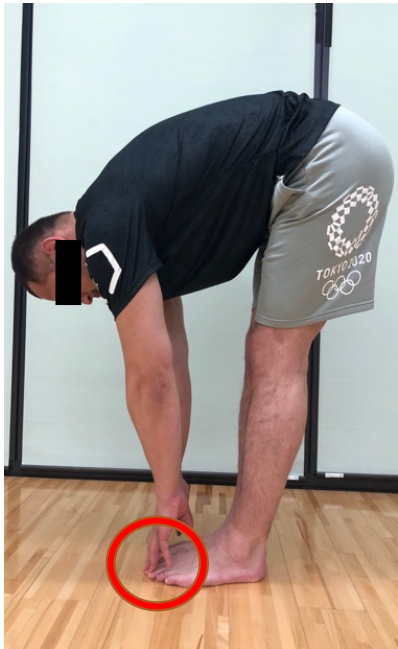

3 point

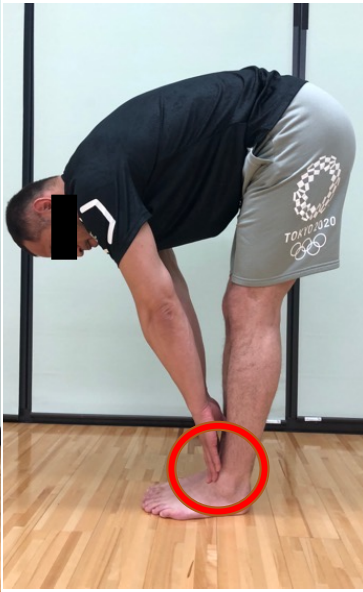

2 point

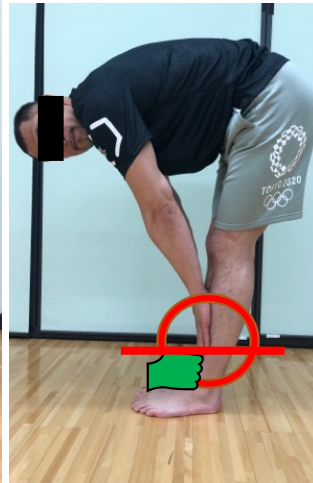

1 point

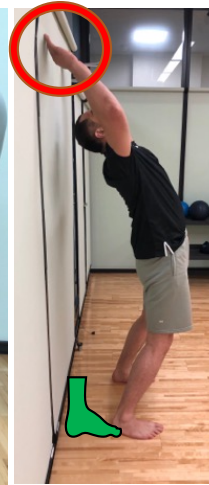

1 point

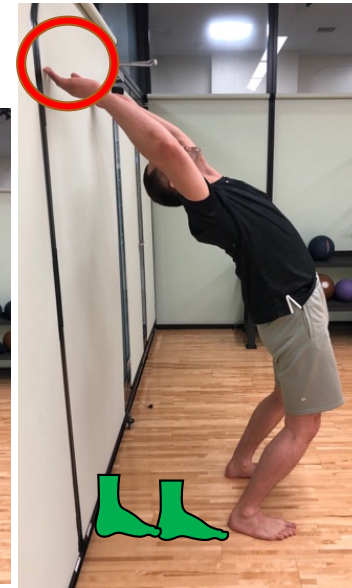

2 point

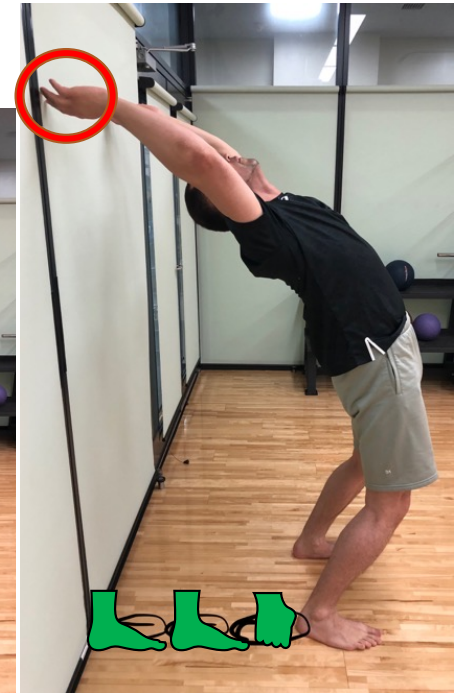

3 point



## 8, Upper and Lower Extremity Mobility and Stability

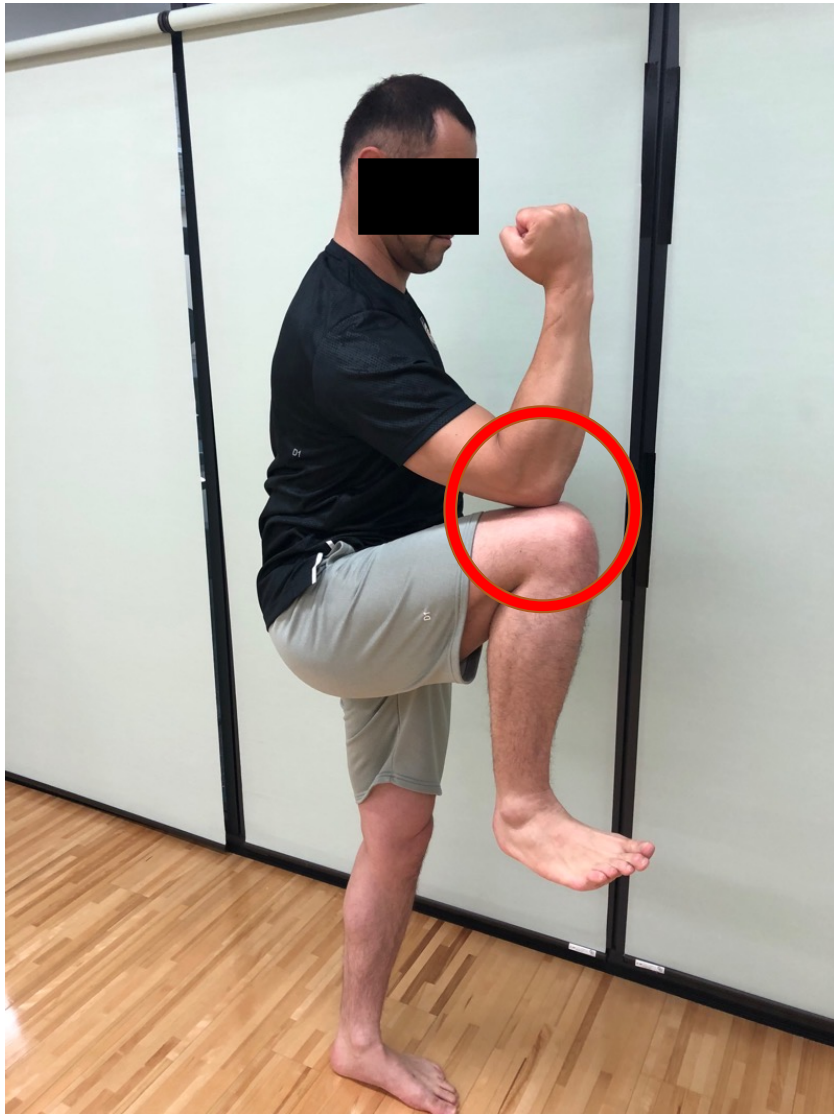

3 sec

L: 1 point, R: 1 point

### Clearing Test

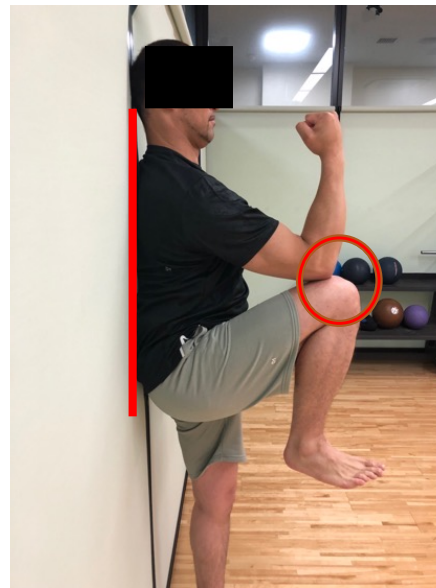

# 9, Mid-section Stability Strength

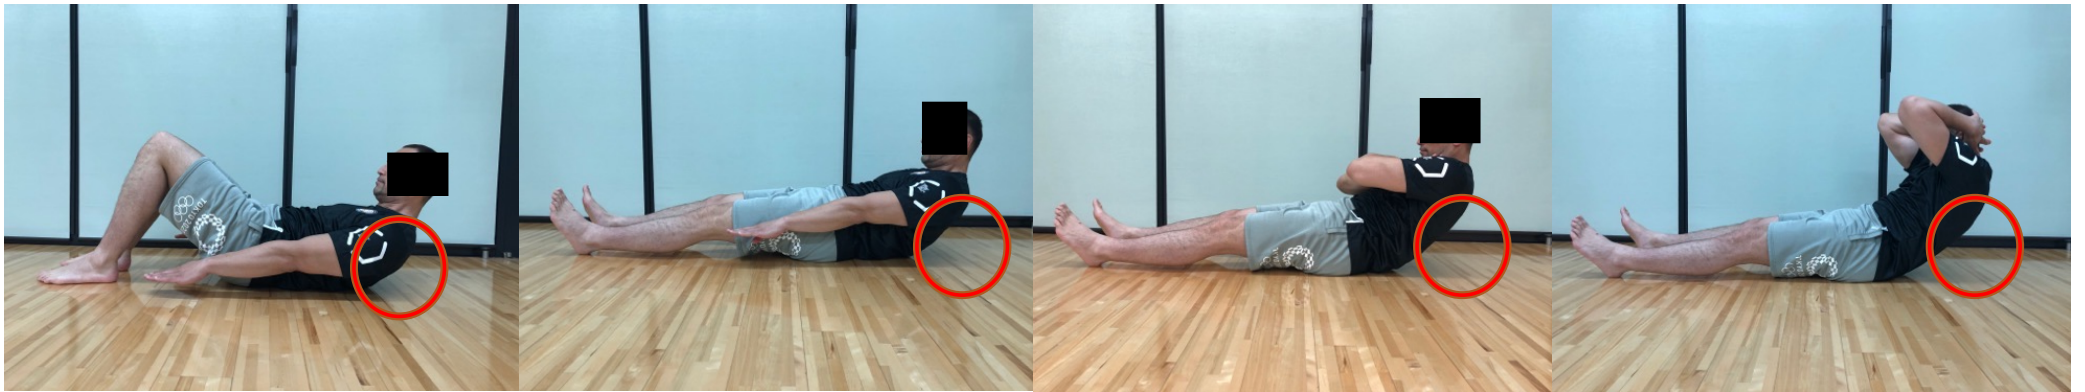

1 point

2 point

3 point

4 point

## 10, Lower Extremity Strength

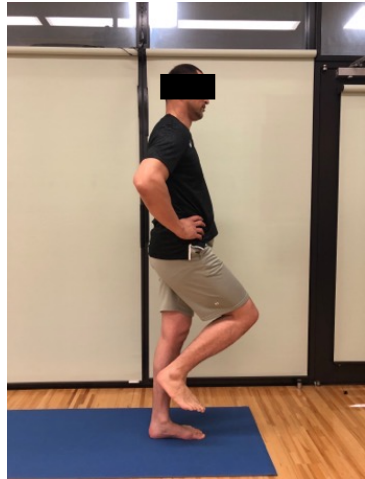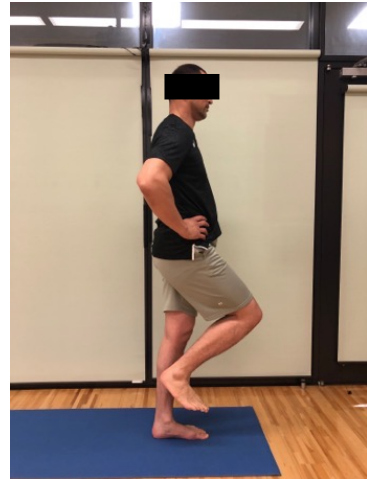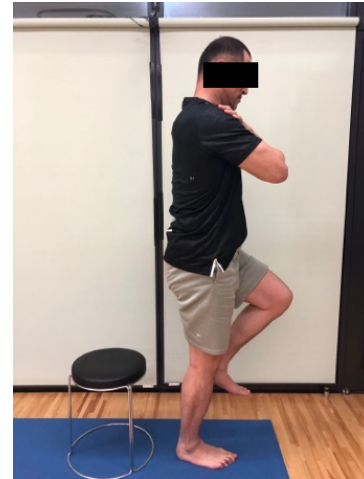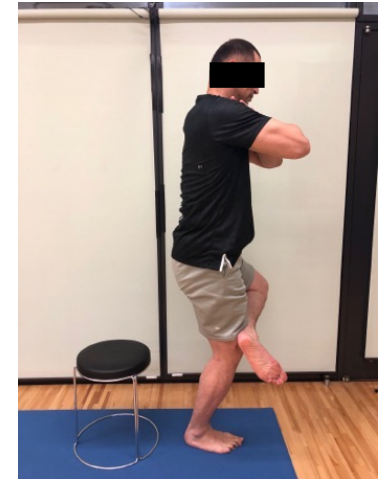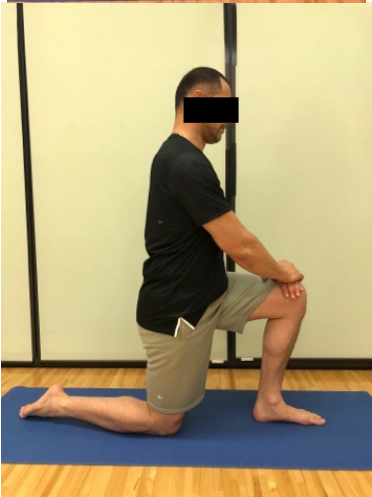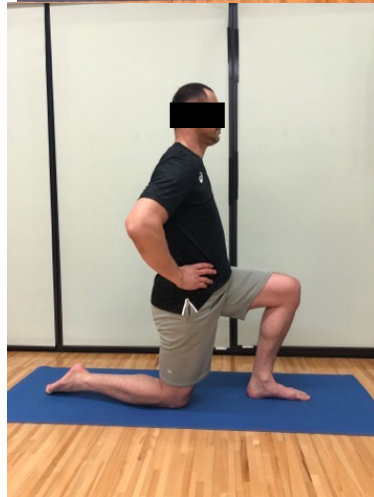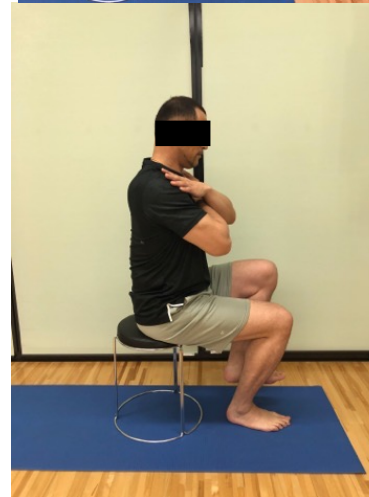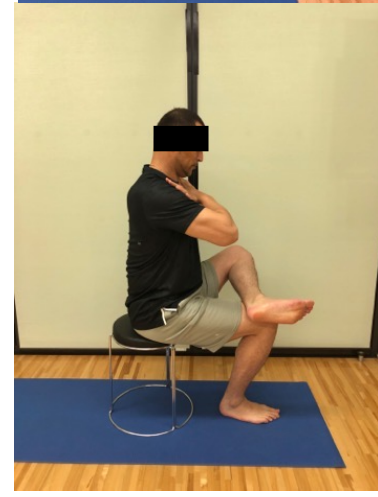

1 point

2 point

3 point

4 point



## 11, Ankle Mobility

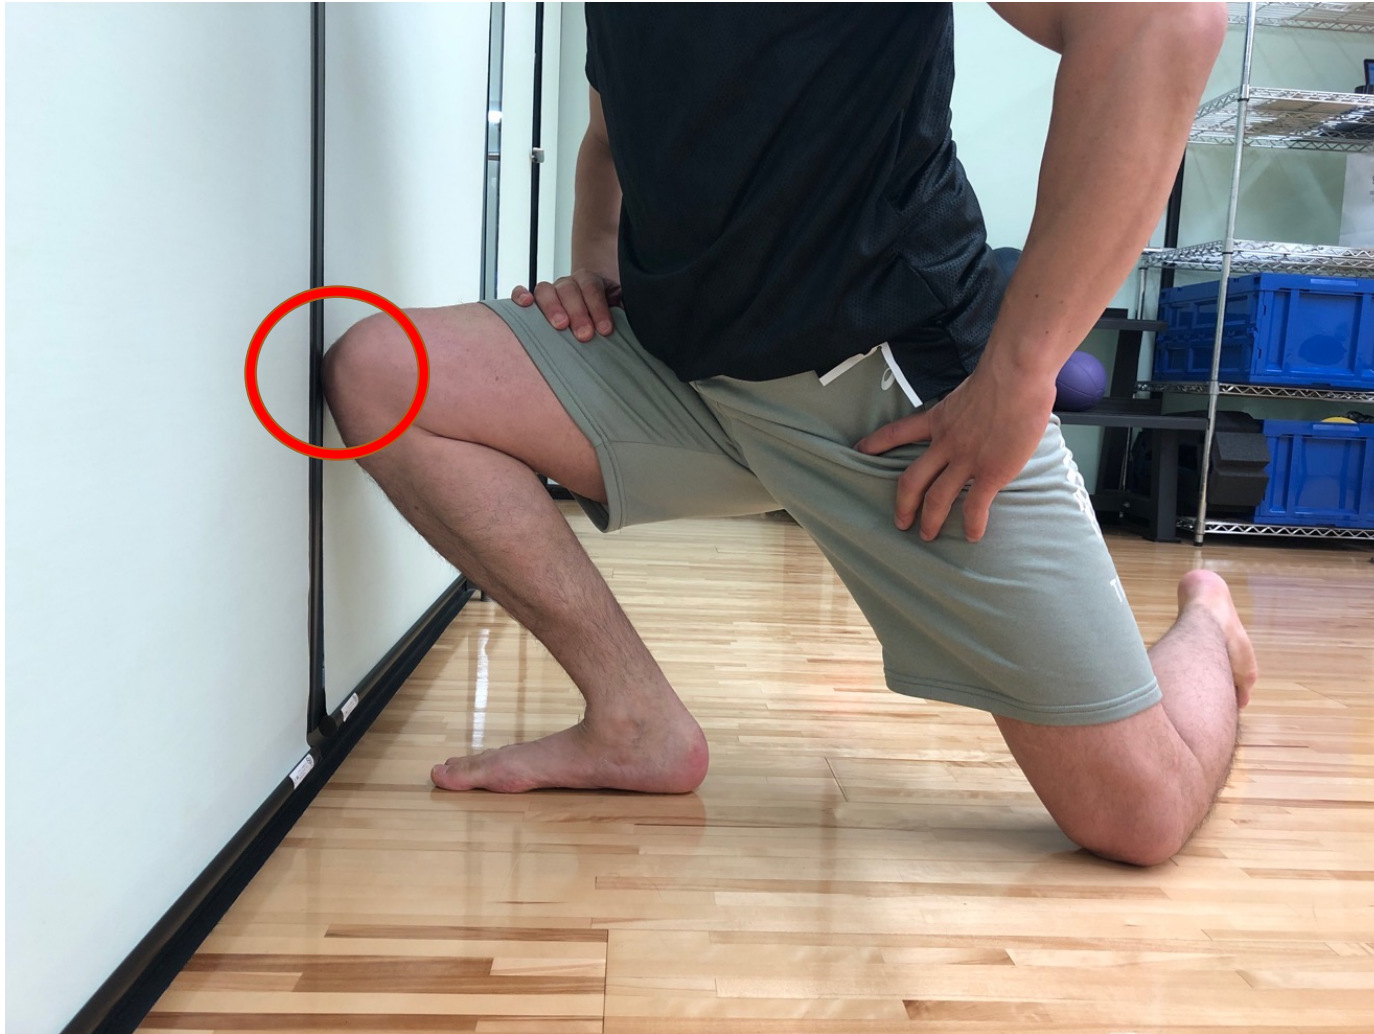

L: 1 point, R: 1 point

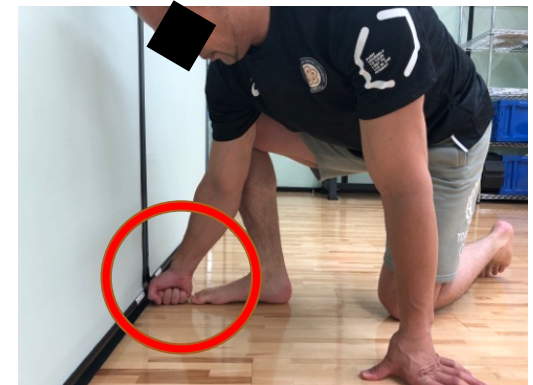

11



## Scoring Chart Sheet

| Name (sports, organization, record, gender, DOB)                        |                | DATE         | 1            | 2            | 3            | 4            |
|-------------------------------------------------------------------------|----------------|--------------|--------------|--------------|--------------|--------------|
| <b>KOJI AWARENESS</b>                                                   |                | <b>TOTAL</b> | <b>SCORE</b> | <b>SCORE</b> | <b>SCORE</b> | <b>SCORE</b> |
| Check 1: Neck Mobility (Total 6 Point)                                  | Front          | 1            |              |              |              |              |
|                                                                         | Back           | 1            |              |              |              |              |
|                                                                         | Left           | 1            |              |              |              |              |
|                                                                         | Right          | 1            |              |              |              |              |
|                                                                         | Right Rotation | 1            |              |              |              |              |
|                                                                         | Right Rotation | 1            |              |              |              |              |
| Check 2: Shoulder Joint Mobility (Total 2 Point)                        | Left           | 1            |              |              |              |              |
|                                                                         | Right          | 1            |              |              |              |              |
| Check 3: Scapular Mobility (Total 2 Point)                              | Left           | 1            |              |              |              |              |
|                                                                         | Right          | 1            |              |              |              |              |
| Check 4: Thoracic Spine Mobility (Total 6 Point)                        | Left           | 3            |              |              |              |              |
|                                                                         | Right          | 3            |              |              |              |              |
| Check 5: Upper Extremity Stability & Strength (Total 4 Point)           |                | 4            |              |              |              |              |
| Check 6: Hip Mobility (Total 8 Point)                                   | Flex/<br>ER    | Left         | 1            |              |              |              |
|                                                                         |                | Right        | 1            |              |              |              |
|                                                                         | Flex/<br>IR    | Left         | 1            |              |              |              |
|                                                                         |                | Right        | 1            |              |              |              |
|                                                                         | Ext/<br>ER     | Left         | 1            |              |              |              |
|                                                                         |                | Right        | 1            |              |              |              |
|                                                                         | Ext/<br>IR     | Left         | 1            |              |              |              |
|                                                                         |                | Right        | 1            |              |              |              |
| Check 7: Hip and Spinal Mobility (Total 6 Point)                        | Front          | 3            |              |              |              |              |
|                                                                         | Back           | 3            |              |              |              |              |
| Check 8: Trunk and Lower Extremity Mobility & Stability (Total 2 Point) | Left           | 1            |              |              |              |              |
|                                                                         | Right          | 1            |              |              |              |              |
| Check 9: Trunk Strength (Total 3 Point)                                 |                | 4            |              |              |              |              |
| Check 10: Lower Extremity Strength (Total 8 Point)                      | Left           | 4            |              |              |              |              |
|                                                                         | Right          | 4            |              |              |              |              |
| Check 11: Ankle Mobility (Total 2 Point)                                | Left           | 1            |              |              |              |              |
|                                                                         | Right          | 1            |              |              |              |              |
| Total Score (50)                                                        |                | 50           | 0            | 0            | 0            | 0            |
