# Supplementary material for: Validity of the KOJI AWARENESS self-screening test for body movement and comparison with functional movement screening
Source: PubMed Central journal article supplement (PMC9803145; doi:10.1371/journal.pone.0277167), 2022-12-30
Supplement: pone.0277167.s003.pdf [file pone.0277167.s003.pdf]

S2 Appendix

Scoring Criteria

| Components                                        | → Set Up →                                                                                                                    | → Movement →                                            | criteria                                                                                                                                                                                                                                   |
|---------------------------------------------------|-------------------------------------------------------------------------------------------------------------------------------|---------------------------------------------------------|--------------------------------------------------------------------------------------------------------------------------------------------------------------------------------------------------------------------------------------------|
| ① Neck Mobility                                   | stand in front of mirror                                                                                                      | bring the chin towards chest                            | 1 point: he/she can touch the chest with chin<br>0 point: he/she can NOT touch the chest with chin                                                                                                                                         |
|                                                   | stand in front of mirror with hands on waist, set elbows in a straight line when viewed from the top                          | tilt head to one side                                   | 1 point: he/she can tilt the mid line of face parallel to the upper arm<br>0 point: he/she can NOT tilt the mid line of face parallel to the upper arm                                                                                     |
|                                                   | stand side way in front of mirror with hands on waist, set elbows in a straight line when viewed from the top                 | rotate head without moving the shoulder                 | 1 point: he/she can tilt the mid line of face parallel to the shoulder<br>0 point: he/she can NOT tilt the mid line of face parallel to the shoulder                                                                                       |
|                                                   | lie on elbows and knees with finger tips at 4 foot lengths away from wall                                                     | look up to the wall                                     | 1 point: he/she can see 2-elbow height mark on wall without difficulty<br>0 point: he/she can NOT see 2-elbow height mark on wall without difficulty                                                                                       |
| ② Shoulder Mobility                               | stand with a back of hand on lower back                                                                                       | reach towards the opposite shoulder blade               | touch inferior angle of the blade                                                                                                                                                                                                          |
| ③ Shoulder Blade (Scapular) Mobility              | stand in front of mirror with finger tips holding opposite earlobe                                                            | move the arm around the head and back                   | 1 point: he/she can make the Arch of the arm go around the head without head tilt<br>0 point: he/she can NOT make the Arch of the arm go around the head without head tilt                                                                 |
| ④ Thoracic Spine Mobility (3 levels)              | sit 2 knuckles away from wall with knees together, hands on shoulders with elbows in a straight line when viewed from the top | rotate body to reach towards wall with elbow            | 1 point: he/she can touch wall with elbow while knees are together<br>0 point: he/she can NOT touch wall with elbow while knees are together                                                                                               |
|                                                   | sit 2 knuckles away from wall with knees together                                                                             | rotate body to reach towards wall with opposite hand    | 1 point: he/she can touch wall with hand by the shoulder, while knees are together<br>0 point: he/she can NOT touch wall with hand by the shoulder, while knees are together                                                               |
|                                                   | sit 2 knuckles away from wall with knees together, hands on opposite shoulders, set elbows at shoulder height                 | rotate body to reach towards wall                       | 1 point: he/she can touch wall with upper arm between shoulder and elbow, while knees are together<br>0 point: he/she can NOT touch wall with upper arm between shoulder and elbow, while knees are together                               |
| ⑤ Upper Extremity Stability & Strength (4 levels) | create front hand-plank position on wall, feet at 4 foot lengths away from wall, hands shoulder width at level of eyes        | hold plank position for 10 seconds                      | 1 point: he/she can hold position for 10 seconds while head, pelvis, ankles are in line<br>0 point: he/she can NOT hold position for 10 seconds while head, pelvis, ankles are in line                                                     |
|                                                   | create front hand-plank position on floor with bent knees                                                                     | hold plank position for 10 seconds                      |                                                                                                                                                                                                                                            |
|                                                   | create front hand-plank position on floor                                                                                     | hold plank position in different conditions             | 1 point: he/she can hold each position while head, pelvis, ankles are in line<br>0 point: he/she can NOT hold each position while head, pelvis, ankles are in line                                                                         |
|                                                   | start with front hand-plank position, then side hand-plank followed by opposite side.                                         | hold plank position for 5, 3 and 3 seconds respectively |                                                                                                                                                                                                                                            |
| ⑥ Hip Mobility                                    | stand in front of wall, 1 foot & 1 knuckle away, keep a knee on wall with the thigh parallel to the floor                     | rotate leg to inside, touch ankle                       | 1 point: he/she can touch medial malleolus without tilting torso<br>0 point: he/she can NOT touch medial malleolus without tilting torso                                                                                                   |
|                                                   | stand in front of wall, 1 foot & 1 knuckle away, keep a knee on wall with the thigh parallel to the floor                     | rotate leg to outside, touch ankle                      | 1 point: he/she can touch lateral malleolus without tilting torso<br>0 point: he/she can NOT touch lateral malleolus without tilting torso                                                                                                 |
|                                                   | bend knee towards buttocks while standing on one leg, keep knees together                                                     | rotate leg to inside, touch ankle                       | 1 point: he/she can touch medial malleolus without tilting torso<br>0 point: he/she can NOT touch medial malleolus without tilting torso                                                                                                   |
|                                                   | bend knee towards buttocks while standing on one leg, keep knees together                                                     | rotate leg to outside, touch ankle                      | 1 point: he/she can touch lateral malleolus without tilting torso<br>0 point: he/she can NOT touch lateral malleolus without tilting torso                                                                                                 |
| ⑦ Hip and Spine Mobility (3 levels)               | stand with feet shoulder width, mark at knuckle length from ankle                                                             | bend over to reach the mark                             | 1 point: he/she can touch one knuckle above ankle<br>0 point: he/she can NOT touch one knuckle above ankle                                                                                                                                 |
|                                                   | stand with feet shoulder width                                                                                                | bend over to reach ankle joint                          | 1 point: he/she can touch ankle joint<br>0 point: he/she can NOT touch ankle joint                                                                                                                                                         |
|                                                   | stand with feet shoulder width                                                                                                | bend over to reach toes                                 | 1 point: he/she can touch toes<br>0 point: he/she can NOT touch toes                                                                                                                                                                       |
|                                                   | stand 1 foot length away from wall with back facing wall                                                                      | touch wall with hands over head                         | 1 point: he/she can touch wall from 1 foot length away<br>0 point: he/she can NOT touch wall from 1 foot length away                                                                                                                       |
|                                                   | stand 2 foot lengths away from wall with back facing wall                                                                     | touch wall with hands over head                         | 1 point: he/she can touch wall from 2 feet length away<br>0 point: he/she can NOT touch wall from 2 feet length away                                                                                                                       |
|                                                   | stand 2 foot and 1 knuckle lengths away from wall with back facing wall                                                       | touch wall with hands over head                         | 1 point: he/she can touch wall from 2 feet and 1 knuckle length away<br>0 point: he/she can NOT touch wall from 2 feet and 1 knuckle length away                                                                                           |
| ⑧ Upper and Lower Extremity Mobility & Stability  | stand with feet shoulder width                                                                                                | bring one side of elbow and knee together               | 1 point: he/she can hold elbow and knee together for 5 seconds without tilting torso<br>0 point: he/she can NOT hold elbow and knee together for 5 seconds without tilting torso                                                           |
|                                                   | stand with back against wall, heels 1 knuckle away from wall                                                                  | bring one side of elbow and knee together               | 1 point: he/she can touch elbow to the knee while back of head and opposite upper and lower back stay on the wall<br>0 point: he/she can NOT touch elbow to the knee while back of head and opposite upper and lower back stay on the wall |
| ⑨ Mid-section Stability & Strength (4 levels)     | lie on back on floor with knees bent, arms straight by torso                                                                  | bring shoulder blades away from the floor               | *1 point: he/she can hold for 5 seconds while shoulder blades are away from floor<br>0 point: he/she can NOT hold for 5 seconds while shoulder blades are away from floor                                                                  |
|                                                   | lie on back on floor with knees straight, arms straight by torso                                                              | bring shoulder blades away from the floor               |                                                                                                                                                                                                                                            |
|                                                   | lie on back on floor with knees straight, hands on opposite shoulders                                                         | bring shoulder blades away from the floor               |                                                                                                                                                                                                                                            |
|                                                   | lie on back on floor with knees straight, hands on back of head                                                               | bring shoulder blades away from the floor               |                                                                                                                                                                                                                                            |
| ⑩ Lower Extremity Strength (4 levels)             | Sit on half kneeling position, hands on front knee                                                                            | stand up and down using hands                           | 1 point: he/she can stand up and down without losing control<br>0 point: he/she can NOT stand up and down without losing control                                                                                                           |
|                                                   | Sit on half kneeling position, hands on waist                                                                                 | stand up and down                                       |                                                                                                                                                                                                                                            |
|                                                   | Sit on chair with one leg off floor, hands on opposite shoulders                                                              | stand up and down with one leg                          |                                                                                                                                                                                                                                            |
|                                                   | Sit on chair with legs crossed, hands on opposite shoulders                                                                   | stand up and down with legs crossed                     |                                                                                                                                                                                                                                            |
| ⑪ Ankle Mobility                                  | toe 1 knuckle away from wall while in half kneeling                                                                           | bring knee to wall                                      | 1 point: he/she can touch wall by knee without lifting heel<br>0 point: he/she can NOT touch wall by knee without lifting heel                                                                                                             |
